# Supplementary material
Source: PubMed Central journal article supplement (PMC4329085)
Supplement: NIHMS627767-supplement-Supp_TableS1-S2___FigureS1-S2.pdf [file NIHMS627767-supplement-Supp_TableS1-S2___FigureS1-S2.pdf]

## Supplementary material:

**Table 1:** Tissue distribution and sites of origin for the pattern recognition molecules of the lectin pathway.

| Protein   | Tissue distribution                                   | References |
|-----------|-------------------------------------------------------|------------|
| MBL       | Liver                                                 | [1-3]      |
| M-ficolin | Peripheral blood leukocytes, lung                     | [4-7]      |
| L-ficolin | Liver                                                 | [6, 8]     |
| H-ficolin | Liver (hepatocytes, bile duct epithelial cells), lung | [9, 10]    |
| CL-L1     | Liver                                                 | [11]       |

In addition to the references above describing tissue distribution and sites of origin for the lectin pathway proteins, a Swedish company has specialized in RNA and immunohistochemical analyses of all human proteins. These are displayed online at [www.proteinatlas.org](http://www.proteinatlas.org) [12]. Below is a summary of the pattern recognition molecules of the lectin pathway proteins based on their distribution according to [www.proteinatlas.org](http://www.proteinatlas.org). The tissues are listed according to expression from highest to lowest.

**Table 2:** Tissue distribution of the pattern recognition molecules according to the Proteinatlas.org.

| Protein (gene)   | RNA                                                  | IHC                                                                                                                                                                    |
|------------------|------------------------------------------------------|------------------------------------------------------------------------------------------------------------------------------------------------------------------------|
| MBL (mbl2)       | Liver                                                | Highly specific cytoplasmic expression in liver.                                                                                                                       |
| M-ficolin (fcn1) | Bone marrow, appendix, spleen, urinary bladder, lung | A subset of leukocytes, macrophages in lung, cells in spleen and bone marrow.                                                                                          |
| L-ficolin (fcn2) | Liver                                                | Pending analyses.                                                                                                                                                      |
| H-ficolin (fcn3) | Lung, liver                                          | Fractions of cells in the gastrointestinal tract, thyroid gland and hepatocytes showed distinct granular cytoplasmic staining. The adrenal gland was strongly stained. |
| CL-L1 (colec10)  | Liver                                                | Normal liver tissue showed moderate to strong, often granular, cytoplasmic staining.                                                                                   |

IHC (Immunohistochemical staining)

**Figure 1:** MBL levels in patients with acute liver failure at day 1 and day 3 in relation to infection status. The box plots represent median and 25–75 percentiles. Upper and lower lines are the upper and lower adjacent values.

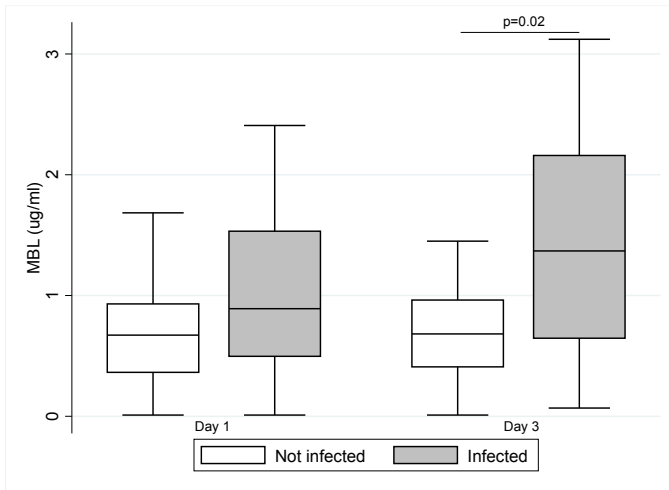

**Figure 2:** M-ficolin levels in patients with acute liver failure at day 1 and day 3 in relation to the SIRS criteria.

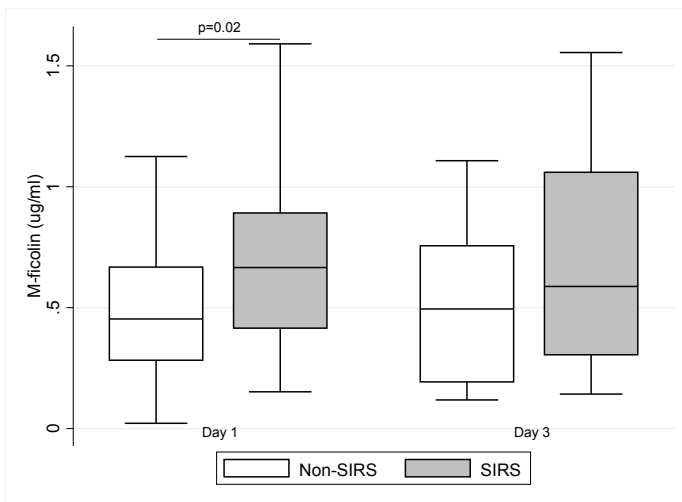

## References:

- [1] Wild J, Robinson D, Winchester B. Isolation of mannose-binding proteins from human and rat liver. *Biochem J* 1983; 210: 167-174.
- [2] Colley K J, Beranek M C, Baenziger J U. Purification and characterization of the core-specific lectin from human serum and liver. *Biochem J* 1988; 256: 61-68.
- [3] Summerfield J A, Taylor M E. Mannose-binding proteins in human serum: identification of mannose-specific immunoglobulins and a calcium-dependent lectin, of broader carbohydrate specificity, secreted by hepatocytes. *Biochim Biophys Acta* 1986; 883: 197-206.
- [4] Lu J, Tay P N, Kon O L, Reid K B. Human ficolin: cDNA cloning, demonstration of peripheral blood leucocytes as the major site of synthesis and assignment of the gene to chromosome 9. *Biochem J* 1996; 313 ( Pt 2): 473-478.
- [5] Lu J, Le Y, Kon O L, Chan J, Lee S H. Biosynthesis of human ficolin, an *Escherichia coli*-binding protein, by monocytes: comparison with the synthesis of two macrophage-specific proteins, C1q and the mannose receptor. *Immunology* 1996; 89: 289-294.
- [6] Endo Y, Sato Y, Matsushita M, Fujita T. Cloning and characterization of the human lectin P35 gene and its related gene. *Genomics* 1996; 36: 515-521.
- [7] Liu Y, Endo Y, Iwaki D, Nakata M, Matsushita M, Wada I, et al. Human M-ficolin is a secretory protein that activates the lectin complement pathway. *J Immunol* 2005; 175: 3150-3156.
- [8] Matsushita M, Endo Y, Taira S, Sato Y, Fujita T, Ichikawa N, et al. A novel human serum lectin with collagen- and fibrinogen-like domains that functions as an opsonin. *J Biol Chem* 1996; 271: 2448-2454.
- [9] Akaiwa M, Yae Y, Sugimoto R, Suzuki S O, Iwaki T, Izuhara K, et al. Hakata antigen, a new member of the ficolin/opsonin p35 family, is a novel human lectin secreted into bronchus/alveolus and bile. *J Histochem Cytochem* 1999; 47: 777-786.

- [10] Fukutomi T, Ando B, Sakamoto S, Sakai H, Nawata H. Thermolabile beta-2 macroglycoprotein (Hakata antigen) in liver disease: biochemical and immunohistochemical study. *Clin Chim Acta* 1996; 255: 93-106.
- [11] Ohtani K, Suzuki Y, Eda S, Kawai T, Kase T, Yamazaki H, et al. Molecular cloning of a novel human collectin from liver (CL-L1). *J Biol Chem* 1999; 274: 13681-13689.
- [12] Uhlen M, Oksvold P, Fagerberg L, Lundberg E, Jonasson K, Forsberg M, et al. Towards a knowledge-based Human Protein Atlas. *Nat Biotechnol* 2010; 28: 1248-1250.
